# Supplementary material for: Pharmacy-based immunization: a systematic review
Source: Frontiers journal article supplement (doi:10.3389/fpubh.2023.1152556), 2023-04-13
Supplement: Table_1.pdf [file Table_1.pdf]

## 1 APPENDIX

- 1 Tables [2](#)[3](#) and [4](#).

**Table 2.** Literature review: qualitative studies

| Author                                                                                    | Year | Title                                                                                                                                                       | Journal                                                           | Country      | Methods                        | Disease             |
|-------------------------------------------------------------------------------------------|------|-------------------------------------------------------------------------------------------------------------------------------------------------------------|-------------------------------------------------------------------|--------------|--------------------------------|---------------------|
| Jackson, A.B., Humphries, T.L., et al. <a href="#">Jackson et al. (2004)</a>              | 2004 | Clinical Pharmacy Travel Medicine Services: A New Frontier                                                                                                  | Annals of Pharmacotherapy                                         | USA          | Review                         | travel vaccines     |
| Evenson, C.J., Gierach, M.R., et al. <a href="#">Evenson et al. (2005)</a>                | 2005 | Nursing Program Partners With Community to Implement Neighborhood Influenza Immunization Clinics                                                            | Home Health Care Management & Practice                            | USA          | Review                         | influenza           |
| Koonin, L.M., et al. <a href="#">Koonin et al. (2011)</a>                                 | 2011 | CDC's 2009 H1N1 vaccine pharmacy initiative in the United States: implications for future public health and pharmacy collaborations for emergency response  | Disaster medicine and public health preparedness                  | USA          | Report                         | influenza           |
| Keimer, J.C. and Mousa, S.A. <a href="#">Keimer and Mousa (2012)</a>                      | 2012 | Expanding the role of community pharmacy: an evaluation of generic drug discount programs, pharmacy based immunization services and convenient care clinics | Pharma Scholars Library                                           | USA          | Review                         | -                   |
| Sheffer, J. <a href="#">Sheffer (2013)</a>                                                | 2013 | Pharmacy-based immunizations: Getting the word out                                                                                                          | Pharmacy Today                                                    | USA          | Summary of a presentation      | -                   |
| Bach, Albert and Goad, Jeffery <a href="#">Bach and Goad (2015)</a>                       | 2015 | The role of community pharmacy-based vaccination in the USA: current practice and future directions                                                         | Integrated Pharmacy Research and Practice                         | USA          | Review                         | influenza           |
| Miller, R. and Goodman, C. <a href="#">Miller and Goodman (2016)</a>                      | 2016 | Performance of retail pharmacies in low- and middle-income Asian settings: a systematic review                                                              | Health Policy and Planning                                        | UK           | Review, case study             | -                   |
| Burson, R.C., Buttenheim, A.M., et al. <a href="#">Burson et al. (2016)</a>               | 2016 | Community pharmacies as sites of adult vaccination: A systematic review                                                                                     | Human Vaccines & Immunotherapeutics                               | USA          | Review                         | influenza           |
| Kirkdale, C.L., Nebout, G., et al. <a href="#">Kirkdale et al. (2016)</a>                 | 2016 | Benefits of pharmacist-led flu vaccination services in community pharmacy Vaccination antigrippale parle pharmacien en officine: quel apport?               | Annales Pharmaceutiques Françaises                                | France       | Review                         | influenza           |
| Kirkdale, C.L., Nebout, G., et al. <a href="#">Kirkdale et al. (2017)</a>                 | 2017 | Implementation of flu vaccination in community pharmacies: Understanding the barriers and enablers                                                          | Annales Pharmaceutiques Françaises                                | France       | Review                         | influenza           |
| Fava, J.P., Colleran, J., et al. <a href="#">Fava et al. (2017)</a>                       | 2017 | Adolescent human papillomavirus vaccination in the United States: Opportunities for integrating pharmacies into the immunization neighborhood               | Human Vaccines & Immunotherapeutics                               | USA          | Review                         | HPV                 |
| Klepser, D.G. and Klepser, M.E. <a href="#">Klepser and Klepser (2018)</a>                | 2018 | Point-of-care testing in the pharmacy: how is the field evolving?                                                                                           | Expert Review of Molecular Diagnostics                            | USA          | Review                         | -                   |
| Guayta-Escobies, R., Urbiztondo, L., et al. <a href="#">Guayta-Escobies et al. (2018)</a> | 2018 | Vaccination coverage and community pharmacy: A strategically necessary and operationally feasible binomial?                                                 | Vacunas                                                           | Spain        | Review                         | influenza           |
| Pattin, A. and Sherman, L. <a href="#">Pattin and Sherman (2018)</a>                      | 2018 | Experiences Among African American Community Members With Pharmacy-Based Immunization Services in Detroit, Michigan                                         | Journal of Pharmacy Technology                                    | USA          | Focus group                    | -                   |
| William A. Calo, Parth D. Shah, et al. <a href="#">Calo et al. (2019)</a>                 | 2019 | Implementing pharmacy-located HPV vaccination: findings from pilot projects in five U.S. states                                                             | Human Vaccines & Immunotherapeutics                               | USA          | Pilot project, case study      | HPV                 |
| Adunlin, George and Murphy, Pilar et al. <a href="#">Adunlin et al. (2020)</a>            | 2020 | COVID-19: How Can Rural Community Pharmacies Respond to the Outbreak?                                                                                       | The Journal of Rural Health                                       | USA          | Review                         | COVID-19            |
| Al Aloola, N., et al. <a href="#">Al Aloola et al. (2020)</a>                             | 2020 | Community needs and preferences for community pharmacy immunization services                                                                                | Vaccine                                                           | Saudi Arabia | Interview                      | -                   |
| Czech, M., Balcerzak, M., et al. <a href="#">Czech et al. (2020)</a>                      | 2020 | Flu Vaccinations in Pharmacies—A Review of Pharmacists Fighting Pandemics and Infectious Diseases                                                           | International Journal of Environmental Research and Public Health | Poland       | Review                         | influenza, COVID-19 |
| Alsaleh, N. <a href="#">LePan (2020)</a>                                                  | 2020 | Pharmacist-led flu vaccination services in community pharmacy: Experiences and Benefit                                                                      | SPER Publications and Solutions Pvt. Ltd.                         | Saudi Arabia | Review                         | influenza           |
| Eisenstadt, M., Ramachandran, M., et al. <a href="#">Eisenstadt et al. (2020)</a>         | 2020 | "COVID-19 Antibody Test/Vaccination Certification: There's an App for That,"                                                                                | IEEE Open Journal of Engineering in Medicine and Biology          | UK           | Project development: prototype | COVID-19            |
| Daniel, Casey L., Lawson, Frances et al. <a href="#">Daniel et al. (2021)</a>             | 2021 | Enrolling a rural community pharmacy as a Vaccines for Children provider to increase HPV vaccination: a feasibility study                                   | BMC Public Health                                                 | USA          | Interview, data, case study    | HPV                 |
| Alghanmi, N., Alotaibi, R. et al. <a href="#">Alghanmi et al. (2022)</a>                  | 2022 | A Survey of Location-Allocation of Points of Dispensing During Public Health Emergencies                                                                    | Frontiers in Public Health                                        | Saudi Arabia | Review                         | COVID-19            |
| Kim, C., et al. <a href="#">Kim et al. (2022)</a>                                         | 2022 | COVID-19 Vaccine Provider Access and Vaccination Coverage Among Children Aged 5-11 Years - United States, November 2021-January 2022                        | MMWR. Morbidity and mortality weekly report                       | USA          | Report                         | COVID-19            |
| Kulczycki, A. and Shewchuk, R. <a href="#">Kulczycki and Shewchuk (2022)</a>              | 2022 | Back to Basics: A general approach to improving Covid and adult immunization delivery focused on Pharmacy-Based immunization services                       | Vaccine                                                           | USA          | Review, strategy proposal      | COVID-19            |
| Lampasona, M. and Pantaleo L. <a href="#">Lampasona and Pantaleo (2022)</a>               | 2022 | The Role of Pharmacies in Immunization Programs and Health Promotion                                                                                        | Archives of Pharmacy Practice                                     | Italy        | Review                         | COVID-19            |

Table 3. Literature review: statistical approaches

| Autor                                                                       | Year | Title                                                                                                                                                                                                                                      | Journal                                            | Country     | Methods                                          | Disease                                                                                                                                               |
|-----------------------------------------------------------------------------|------|--------------------------------------------------------------------------------------------------------------------------------------------------------------------------------------------------------------------------------------------|----------------------------------------------------|-------------|--------------------------------------------------|-------------------------------------------------------------------------------------------------------------------------------------------------------|
| Ernst, M.E., Chalmers, C.V., et al. [Ernst et al., 1997]                    | 1997 | Implementation of a Community Pharmacy-Based Influenza Vaccination Program                                                                                                                                                                 | Journal of the American Pharmaceutical Association | USA         | Case study, data collection                      | influenza                                                                                                                                             |
| Ernst, M.E., Bergus, G.R., and Sorofman, B.A. [Ernst et al., 2001]          | 2001 | Research: Patients' Acceptance of Traditional and Nontraditional Immunization Providers                                                                                                                                                    | Journal of the American Pharmaceutical Association | USA         | survey                                           | -                                                                                                                                                     |
| Van Amburgh, J.A., Waite, N.M., et al. [Van Amburgh et al., 2001]           | 2001 | Improved Influenza Vaccination Rates in a Rural Population as a Result of a Pharmacist-Managed Immunization Campaign                                                                                                                       | Pharmacotherapy                                    | USA         | Chart review                                     | influenza                                                                                                                                             |
| Van Amburgh, J.A., Waite, N.M., et al. [Van Amburgh et al., 2001]           | 2001 | Improved Influenza Vaccination Rates in a Rural Population as a Result of a Pharmacist-Managed Immunization Campaign                                                                                                                       | Pharmacotherapy                                    | USA         | Experiment                                       | influenza                                                                                                                                             |
| Doucette, W.R., Kreling, D.H., et al. [Doucette et al., 2006]               | 2006 | Evaluation of Community Pharmacy Service Mix: Evidence from the 2004 National Pharmacist Workforce Study.                                                                                                                                  | Journal of the American Pharmacists Association    | USA         | Cross-sectional study                            | -                                                                                                                                                     |
| Goode, J.V., Mott, D., and Stanley, D. [Goode et al., 2007]                 | 2007 | Assessment of an immunization program in a supermarket chain pharmacy                                                                                                                                                                      | Journal of the American Pharmacists Association    | USA         | statistical analysis                             | influenza, pneumococcal vaccines, hepatitis A, hepatitis B, measles, mumps, rubella, varicella, meningococcal, and tetanus-diphtheria travel vaccines |
| Hind, C.A., Bond, C.M., et al. [Hind et al., 2008]                          | 2008 | Needs Assessment Study for Community Pharmacy Travel Medicine Services.                                                                                                                                                                    | Medicine Services. Journal of Travel Medicine      | UK          | questionnaire survey                             | influenza                                                                                                                                             |
| Prosser, L.A., O'Brien, M.A., et al. [Prosser et al., 2008]                 | 2008 | Non-Traditional Settings for Influenza Vaccination of Adults                                                                                                                                                                               | PharmacoEconomics                                  | USA         | Telephone interview                              | influenza                                                                                                                                             |
| Usami, T., Hashiguchi, M., et al. [USAMI et al., 2009]                      | 2009 | Impact of Community Pharmacists Advocating Immunization on Influenza Vaccination Rates among the Elderly                                                                                                                                   | Yakugaku Zasshi                                    | Japan       | Experiment carried out, cluster randomized trial | influenza                                                                                                                                             |
| Westrick, S.C., Watcharamongkorn, S., et al. [Westrick et al., 2009]        | 2009 | Community pharmacy involvement in vaccine distribution and administration                                                                                                                                                                  | Vaccine                                            | USA         | Survey                                           | diphtheria-tetanus-pertussis, influenza, pneumococcal polysaccharide, travel vaccines                                                                 |
| Westrick, S. and Mounb, J. [Westrick and Mounb, 2009]                       | 2009 | Impact of perceived innovation characteristics on adoption of pharmacy-based in-house immunization services                                                                                                                                | International Journal of Pharmacy Practice         | USA         | survey                                           | -                                                                                                                                                     |
| Westrick S.C. and Brelan M.L. [Westrick and Brelan, 2009]                   | 2009 | Sustainability of pharmacy-based innovations: The case of in-house immunization services                                                                                                                                                   | Journal of the American Pharmacists Association    | USA         | cross-sectional study                            | -                                                                                                                                                     |
| Hess, K.M., Dai, C.-W., et al. [Hess et al., 2010]                          | 2010 | Measuring outcomes of a pharmacist-run travel health clinic located in an independent community pharmacy                                                                                                                                   | Journal of the American Pharmacists Association    | USA         | Survey                                           | -                                                                                                                                                     |
| Crawford, N.D., Blaney, S., et al. [Crawford et al., 2011]                  | 2011 | Individual- and Neighborhood-Level Characteristics Associated with Support of In-Pharmacy Vaccination among ESAP-Registered Pharmacies: Pharmacists' Role in Reducing Racial/Ethnic Disparities in Influenza Vaccinations in New York City | Journal of Urban Health                            | USA         | statistical analysis                             | HIV                                                                                                                                                   |
| AlMahasis, S. [AlMahasis, 2011]                                             | 2011 | Impact of the COVID-19 Pandemic on Pharmacy-based Immunization in Rural USA: a cross-sectional study of community pharmacists from five Southeastern States                                                                                | Auburn University                                  | USA         | survey                                           | influenza                                                                                                                                             |
| Doucette, W.R., McDonough, R.P., et al. [Doucette et al., 2012]             | 2012 | Three-year financial analysis of pharmacy services at an independent community pharmacy                                                                                                                                                    | Journal of the American Pharmacists Association    | USA         | Examination of records                           | influenza, herpes zoster, pneumococcal immunization, cholesterol screenings, adherence management services                                            |
| Goad, J.A., Taitel, M.S., et al. [Goad et al., 2012]                        | 2012 | Vaccinations Administered During Off-Clinic Hours at a National Community Pharmacy: Implications for Increasing Patient Access and Convenience                                                                                             | The Annals of Family Medicine                      | USA         | data bases, case study                           | influenza                                                                                                                                             |
| Murphy, P.A., Frazer, S.G., et al. [Murphy et al., 2012]                    | 2012 | Pharmacy provision of influenza vaccinations in medically underserved communities.                                                                                                                                                         | Journal of the American Pharmacists Association    | USA         | retrospective study, statistical analysis        | influenza                                                                                                                                             |
| Boda, P.J. [Boda, 2013]                                                     | 2013 | Medications in Mexico: The Growth and Distribution of Pharmacies in Ciudad Juárez, Chihuahua, Mexico from 1996-2011                                                                                                                        | International Journal of Geosciences               | USA         | cross-sectional questionnaire survey             | -                                                                                                                                                     |
| Singhal, P.K., and Zhang, D. [Singhal and Zhang, 2014]                      | 2014 | Costs of adult vaccination in medical settings and pharmacies                                                                                                                                                                              | Journal of Managed Care Pharmacy                   | USA         | data bases                                       | herpes, pneumococcal vaccine, influenza                                                                                                               |
| Marra, F., Kaczorowski, J., et al. [Marra et al., 2014]                     | 2014 | Pharmacy-based Immunization in Rural Communities Strategy (PhICS): A community cluster-randomized trial                                                                                                                                    | Canadian Pharmacists Journal                       | Canada      | cluster-randomized trial                         | influenza                                                                                                                                             |
| Nouvellet, C. and Sauvart-Rochat, M.P. [Nouvellet and Sauvart-Rochat, 2015] | 2015 | Pharmacy-based immunization in France: visions of pharmacist, of physician and of patient: Marie-Pierre Sauvart-Rochat                                                                                                                     | European Journal of Public Health                  | France      | cross-sectional study                            | -                                                                                                                                                     |
| Maceira, D., Goguadze, K., and Gotsadze, G. [Maceira et al., 2015]          | 2015 | The drivers of facility-based immunization performance and costs. An application to Moldova                                                                                                                                                | Vaccine                                            | Moldova     | least squares regression analysis                | -                                                                                                                                                     |
| McConeghy, K.W. [McConeghy, 2015]                                           | 2015 | The Impact of Pharmacy-Based Immunization on Vaccination Rates and Prevalence of Influenza Virus                                                                                                                                           | Thesis                                             | USA         | survey                                           | influenza                                                                                                                                             |
| Fitzgerald, T.J., Kang, Y., et al. [Fitzgerald et al., 2016]                | 2016 | Integrating pharmacies into public health program planning for pandemic influenza vaccine response                                                                                                                                         | Vaccine                                            | USA         | case study, data analysis, experiment            | influenza                                                                                                                                             |
| McConeghy, K.W., and Wing, C. [McConeghy and Wing, 2016]                    | 2016 | A national examination of pharmacy-based immunization statutes and their association with influenza vaccinations and preventive health                                                                                                     | Vaccine                                            | USA         | experiment                                       | influenza                                                                                                                                             |
| Inguva, S., Sautter, J.M., et al. [Inguva et al., 2017]                     | 2017 | Population characteristics associated with pharmacy-based influenza vaccination in United States survey data                                                                                                                               | Journal of the American Pharmacists Association    | USA         | statistical analysis, regression                 | influenza                                                                                                                                             |
| Islam, J.Y., Gruber, J.F. et al. [Islam et al., 2017]                       | 2017 | Opportunities and Challenges of Adolescent and Adult Vaccination Administration Within Pharmacies in the United States                                                                                                                     | Biomedical Informatics Insights                    | USA         | statistical analysis, interview                  | influenza, pneumococcal, TDAP, MCV4, HPV                                                                                                              |
| Sokolow, L.Z., et al. [Sokolow et al., 2018]                                | 2018 | Scripted Surge Pharmacy Pandemic Exercise: Testing Vaccine Administration and Antiviral Dispensing                                                                                                                                         | Health security                                    | USA         | Case study, simulation                           | influenza                                                                                                                                             |
| Westrick, S.C. et al. [Westrick et al., 2018]                               | 2018 | National survey of pharmacy-based immunization services                                                                                                                                                                                    | Vaccine                                            | USA         | survey                                           | influenza, pneumococcal 13-valent conjugate, herpes zoster, pneumococcal polysaccharide, adolescent vaccinations                                      |
| Magambo, N.K., Bajunirwe, F. and Bagenda, F. [Magambo et al., 2020]         | 2020 | Geographic location of health facility and immunization program performance in Hoima district, western Uganda: a health facility level assessment                                                                                          | BMC Public Health                                  | Uganda      | Interview, data, case study                      | -                                                                                                                                                     |
| Liao, Mott, D.A., Ford II, J.H., et al. [Liao et al., 2021]                 | 2021 | Influenza vaccination rates and location for receiving the influenza vaccination among older adult Medicare beneficiaries                                                                                                                  | Journal of the American Pharmacists Association    | USA         | statistical analysis of data                     | influenza                                                                                                                                             |
| Gharpure R., Guo A., et al. [Gharpure et al., 2021]                         | 2021 | Early COVID-19 First-Dose Vaccination Coverage Among Residents and Staff Members of Skilled Nursing Facilities Participating in the Pharmacy Partnership for Long-Term Care Program — United States, December 2020–January 2021            | Report MMWR Early Release                          | USA         | statistical analysis                             | COVID-19                                                                                                                                              |
| Olatunji, E.A., Ogunsola, A.S., et al. [Olatunji et al., 2021]              | 2021 | Who receives influenza vaccinations at the Pharmacy? An analysis of the Texas Behavioral Risk Factor Surveillance System                                                                                                                   | Vaccine                                            | USA         | statistical analysis                             | influenza                                                                                                                                             |
| Murray, E., Bieniek, K., et al. [Murray et al., 2021]                       | 2021 | Impact of pharmacy intervention on influenza vaccination acceptance: a systematic literature review and meta-analysis                                                                                                                      | International Journal of Clinical Pharmacy         | France, USA | meta-analysis, statistical analysis              | influenza                                                                                                                                             |
| Milkman, K.L., Gandhi, L., et al. [Milkman et al., 2022]                    | 2022 | A 680,000-person megastudy of nudges to encourage vaccination in pharmacies                                                                                                                                                                | Proceedings of the National Academy of Sciences    | USA         | statistical analysis, experiment                 | influenza                                                                                                                                             |

**Table 4.** Literature review: optimization approaches

| Author                                     | Year | Title                                                                                                                                             | Journal                                                                                                | Country            | Methods                                         | Disease   | Vaccination | PB | Costs | FL |
|--------------------------------------------|------|---------------------------------------------------------------------------------------------------------------------------------------------------|--------------------------------------------------------------------------------------------------------|--------------------|-------------------------------------------------|-----------|-------------|----|-------|----|
| Hodgson, M. J., Laporte, G., and Semet, F. | 2002 | A Covering Tour Model for Planning Mobile Health Care Facilities in Suhum District, Ghana                                                         | Journal of Regional Science                                                                            | Ghana              | Mobile-clinics, covering model                  | -         |             |    |       | X  |
| Hodgson et al. (2002)                      |      |                                                                                                                                                   |                                                                                                        |                    |                                                 |           |             |    |       |    |
| Fitzgerald, N., Fitzgerald (2006)          | 2006 | Cost-effectiveness of pharmacy-based influenza immunization programs :a case study in the Capital District Health Authority, Halifax, Nova Scotia | -                                                                                                      | Canada             | Thesis                                          | influenza |             | X  |       |    |
| Jia, H., Ordóñez, F. and Dessouky, M.M.    | 2007 | Solution approaches for facility location of medical supplies for large-scale emergencies                                                         | Computers and Industrial Engineering                                                                   | USA                | Facility location, heuristic                    | -         |             | X  |       | X  |
| Duncan, I.G., Taitel, M.S., et al.         | 2012 | Planning influenza vaccination programs: a cost benefit model                                                                                     | Cost Effectiveness and Resource Allocation                                                             | USA                | Allocation problem, case study                  | influenza | X           |    | X     |    |
| Everett, K.H., Potter, M.A. et al.         | 2013 | Geospatial Analytics to Evaluate Point-of-Dispensing Sites for Mass Immunizations in Allegheny County, Pennsylvania                               | Journal of public health management and practice                                                       | USA                | GIS, location-allocation algorithms, case study | -         | X           |    |       | X  |
| Singh, B., Huang, H.-C., et al.            | 2015 | Optimizing Distribution of Pandemic Influenza Antiviral Drugs                                                                                     | Emerging Infectious Diseases                                                                           | USA                | Facility location, case study                   | influenza |             |    |       | X  |
| Lim, J., et al.                            | 2016 | Coverage models to determine outreach vaccination center locations in low and middle income countries                                             | Operations Research for Health Care                                                                    | India              | case study, location-allocation                 | -         | X           |    |       | X  |
| Bartsch, S.M., Taitel M.S. et al.          | 2018 | Epidemiologic and economic impact of pharmacies as vaccination locations during an influenza epidemic                                             | Vaccine                                                                                                | USA                | agent-based model                               | -         | X           | X  | X     |    |
| Zhang, C., Du, Z., et al.                  | 2019 | Assignment optimization of pandemic influenza antiviral drugs in Urban pharmacies                                                                 | Journal of Ambient Intelligence and Humanized Computing                                                | China              | Assignment problem, case study                  | influenza |             | X  |       |    |
| Sadjadi, S., et al.                        | 2019 | The design of the vaccine supply network under uncertain condition: A robust mathematical programming approach                                    | Journal of Modelling in Management                                                                     | Iran               | case study, location-allocation                 | -         | X           |    |       | X  |
| Lim, J., et al.                            | 2019 | Redesign of vaccine distribution networks                                                                                                         | International Transactions in Operational Research                                                     | sub-Saharan Africa | case study, location-allocation, heuristics     | -         | X           |    |       | X  |
| Risanger, S., Singh, B., et al.            | 2020 | Selecting Pharmacies for COVID-19 Testing to Ensure Access                                                                                        | Health Care Management Science                                                                         | USA                | Facility location                               | COVID-19  |             | X  |       | X  |
| Leithäuser, N., Schneider, J., et al.      | 2020 | Quantifying Covid19-vaccine location strategies for Germany                                                                                       | BMC Health Services Research                                                                           | Germany            | Heuristic, assignment problem                   | COVID-19  |             |    |       | X  |
| Verma VR and Dash U.                       | 2020 | Geographical accessibility and spatial coverage modelling of public health care network in rural and remote India                                 | PLoS ONE                                                                                               | India              | GIS, coverage model, case study                 | -         | X           |    |       | X  |
| Yang, Y. and Rajgopal, J.                  | 2020 | An Iterative Cyclic Algorithm for Designing Vaccine Distribution Networks in Low and Middle-Income Countries                                      | Proceedings on 25th International Joint Conference on Industrial Engineering and Operations Management | USA                | location-allocation, heuristics                 | -         | X           |    |       | X  |
| Bertsimas, D., Digalakis Jr, V., et al.    | 2021 | Where to locate COVID-19 mass vaccination facilities?                                                                                             | Naval Research Logistics                                                                               | USA                | Facility location                               | COVID-19  | X           |    |       | X  |
| Bertsimas et al. (2022)                    |      |                                                                                                                                                   |                                                                                                        |                    |                                                 |           |             |    |       |    |
| Çakır, İ., Tas, M. A. and Ulukan, Z.       | 2021 | Spherical bipolar fuzzy weighted multi-facility location modeling for mobile COVID-19 vaccination clinics                                         | Journal of Intelligent & Fuzzy Systems                                                                 | Turkey             | Multi-facility location problem, heuristic      | COVID-19  | X           |    | X     | X  |
| Munguia-López, A., and Ponce-Ortega, J. M. | 2021 | Fair Allocation of Potential COVID-19 Vaccines Using an Optimization-Based Strategy                                                               | Process Integration and Optimization for Sustainability                                                | Mexico             | Allocation scheme, case study                   | COVID-19  | X           |    |       |    |
| Devi, Y., Patra, S. and Singh, S.P.        | 2021 | A location-allocation model for influenza pandemic outbreaks: A case study in India                                                               | Operations Management Research                                                                         | India              | Facility location                               | influenza |             |    |       | X  |
| Srivastava, V., et al.                     | 2021 | Strengthening the immunization supply chain: A time-to-supply based approach to cold chain network optimization & extension in Madhya Pradesh     | Vaccine                                                                                                | India              | case study, location-allocation, heuristics     | -         | X           |    |       | X  |
| Fadaki, M., Abareshi, A. et al.            | 2022 | Multi-period vaccine allocation model in a pandemic: A case study of COVID-19 in Australia                                                        | Transportation Research Part E: Logistics and Transportation Review                                    | Australia          | case study, allocation model                    | COVID-19  | X           |    |       | X  |
| Goentzel, J., et al.                       | 2022 | Vaccine network design to maximize immunization coverage                                                                                          | Journal of Humanitarian Logistics and Supply Chain Management                                          | Gambia             | case study, location-allocation                 | -         | X           |    |       | X  |
| Bravo, F., Hu, J., and Long, E.            | 2022 | Optimal COVID-19 Vaccination Facility Location                                                                                                    | SSRN                                                                                                   | USA                | Facility location, case study                   | COVID-19  | X           |    |       | X  |
| Lusiantoro, L., et al.                     | 2022 | A Locational Analysis Model of the COVID-19 Vaccine Distribution                                                                                  | Operations and Supply Chain Management: An International Journal                                       | Indonesia          | case study, location-allocation                 | COVID-19  | X           |    |       | X  |

**Table 4.** Note. PB= Pharmacy-based, FL= Facility location
